# Supplementary material
Source: ML conference proceedings conference paper supplement (https://proceedings.neurips.cc/paper_files/paper/2019/hash/7503cfacd12053d309b6bed5c89de212-Abstract.html)
Supplement: Supplementary file [file 7503cfacd12053d309b6bed5c89de212-Supplemental.zip]

---

# Adversarial Training for Free!

---

Anonymous Author(s)

Affiliation

Address

email

## 1 A Complete ImageNet results

Here we provide the results used for generating the ImageNet figures in tables 1 ~5.

Table 1: Val. accuracy and robustness of Resnet-50 models trained with  $\epsilon = 3$ .

| Training     | Evaluated Against |         |         |         |
|--------------|-------------------|---------|---------|---------|
|              | Natural Images    | PGD-10  | PGD-50  | PGD-100 |
| Natural      | 76.038%           | 0.078%  | 0.024%  | 0.014%  |
| Free $m = 2$ | 69.634%           | 29.652% | 28.094% | 27.952% |
| Free $m = 4$ | 61.968%           | 37.332% | 37.108% | 37.096% |
| Free $m = 6$ | 58.096%           | 35.388% | 35.172% | 35.202% |
| Free $m = 8$ | 55.938%           | 33.150% | 32.922% | 32.906% |

Table 2: Validation accuracy and robustness of Resnet-50 models trained with  $\epsilon = 4$ .

| Training     | Evaluated Against |         |         |         |
|--------------|-------------------|---------|---------|---------|
|              | Natural Images    | PGD-10  | PGD-50  | PGD-100 |
| Natural      | 76.038%           | 0.072%  | 0.014%  | 0.010%  |
| Free $m = 2$ | 68.126%           | 23.902% | 21.224% | 20.978% |
| Free $m = 4$ | 60.206%           | 32.768% | 31.878% | 31.816% |
| Free $m = 6$ | 55.988%           | 30.804% | 30.282% | 30.250% |
| Free $m = 8$ | 52.190%           | 29.004% | 28.624% | 28.608% |

Table 3: Validation accuracy and robustness of Resnet-50 models trained with  $\epsilon = 5$ .

| Training     | Evaluated Against |         |         |         |
|--------------|-------------------|---------|---------|---------|
|              | Natural Images    | PGD-10  | PGD-50  | PGD-100 |
| Natural      | 76.038%           | 0.058%  | 0.012%  | 0.006%  |
| Free $m = 2$ | 67.536%           | 20.810% | 16.652% | 16.240% |
| Free $m = 4$ | 59.052%           | 28.000% | 26.342% | 26.262% |
| Free $m = 6$ | 53.326%           | 26.746% | 25.670% | 25.670% |
| Free $m = 8$ | 50.570%           | 25.854% | 25.086% | 25.080% |

2

## 3 B The effect of batch-size

4 Our free training algorithm produces state-of-the-art results on CIFAR-10 and CIFAR-100 and results  
5 in robust models on ImageNet. We see that the ImageNet results are more sensitive to the replay

Table 4: Validation accuracy and robustness of Resnet-50 models trained with  $\epsilon = 6$ .

| Training     | Evaluated Against |         |         |         |
|--------------|-------------------|---------|---------|---------|
|              | Natural Images    | PGD-10  | PGD-50  | PGD-100 |
| Natural      | 76.038%           | 0.052%  | 0.010%  | 0.008%  |
| Free $m = 2$ | 63.628%           | 14.216% | 9.038%  | 8.612%  |
| Free $m = 4$ | 56.808%           | 24.912% | 21.728% | 21.506% |
| Free $m = 6$ | 49.972%           | 23.874% | 21.872% | 21.828% |
| Free $m = 8$ | 47.882%           | 23.122% | 21.266% | 21.228% |

Table 5: Validation accuracy and robustness of Resnet-50 models trained with  $\epsilon = 7$ .

| Training     | Evaluated Against |         |         |         |
|--------------|-------------------|---------|---------|---------|
|              | Natural Images    | PGD-10  | PGD-50  | PGD-100 |
| Natural      | 76.038%           | 0.046%  | 0.012%  | 0.006%  |
| Free $m = 2$ | 64.256%           | 0.084%  | 0.028%  | 0.018%  |
| Free $m = 4$ | 53.824%           | 22.168% | 16.654% | 16.297% |
| Free $m = 6$ | 47.388%           | 13.232% | 7.508%  | 6.576%  |
| Free $m = 8$ | 44.314%           | 13.954% | 9.390%  | 8.828%  |

parameter  $m$ . While, our best results for CIFARs were with  $m = 8$ , our best ImageNet result is with  $m = 4$ . We believe that can be due to the ratio of number of classes ( $N_c$ ) over batch-size ( $b$ ). Our batch-size in the CIFAR experiments was 128. Since, we ran our ImageNet experiments on a single node with four GPUs, we were only able to use a batch-size of 256. If  $N_c/b$  is large and  $m$  is large, the probability that we do not see an example for some random class for more than  $m$  iterations becomes large. This can result in catastrophically forgetting that class. To see the effect of batch-size in practice, we experimented with changing  $b$  for CIFAR-100 and  $m = 8$ . In these experiments, we adjusted the learning-rate when we changed the batch-size. We used the linear learning-rate adjustment rule. The results which are consistent with our guess are summarized in fig. 1.

Generalization and Robustness of CIFAR-100 by varying batch size ( $b$ )

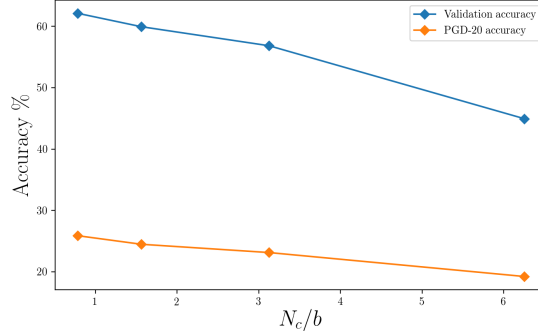

Figure 1: If the number of classes ( $N_c$ ) is large, having a larger batch-size ( $b$ ) can result in better robustness and generalization specially for larger values of  $m$ . In this experiment, we use  $m = 8$  which yields the best result for CIFAR-100 ( $N_c = 100$ ), and vary  $b \in 16, 32, 64, 128$ .

## 15 C Conventional K-PGD adversarial training

16 For completeness, we summarize the K-PGD  $\ell_\infty$  algorithm in alg. 1.

---

**Algorithm 1** Standard Adversarial Training (K-PGD)

---

**Require:** Training samples  $X$ , perturbation bound  $\epsilon$ , step size  $\epsilon_s$ , maximization iterations per minimization step  $K$ , and minimization learning rate  $\tau$

```
1: Initialize  $\theta$ 
2: for epoch = 1 ...  $N_{ep}$  do
3:   for minibatch  $B \subset X$  do
4:     Build  $x_{adv}$  for  $x \in B$  with PGD:
5:     Assign a random perturbation
6:      $r \leftarrow U(-\epsilon, \epsilon)$ 
7:      $x_{adv} \leftarrow x + r$ 
8:     for  $k = 1 \dots K$  do
9:        $g_{adv} \leftarrow \nabla_x l(x_{adv}, y, \theta)$ 
10:       $x_{adv} \leftarrow x_{adv} + \epsilon_s \cdot \text{sign}(g_{adv})$ 
11:       $x_{adv} \leftarrow \text{clip}(x_{adv}, x - \epsilon, x + \epsilon)$ 
12:    end for
13:    Update  $\theta$  with stochastic gradient descent:
14:     $g_\theta \leftarrow \mathbb{E}_{(x,y) \in B} [\nabla_\theta l(x_{adv}, y, \theta)]$ 
15:     $\theta \leftarrow \theta - \tau g_\theta$ 
16:  end for
17: end for
```

---
